# Supplementary material for: Metabolic Profiles and Blood Biomarkers to Discriminate between Benign Thyroid Nodules and Papillary Carcinoma, Based on UHPLC-QTOF-ESI+-MS Analysis
Source: MDPI journal article supplement (doi:10.3390/ijms25063495), 2024-03-20
Supplement: s1 [file s1]

**Table S1.** Molecules (n=166) separated using HPLC-QTOF-ESI<sup>+</sup>-MS and identified, according to their m/z values. The experimental m/z values were compared with the average of theoretical m/z values from the International database HMDB (Human Metabolomic DataBase). The accuracy of (theoretical – experimental) m/z values was below 20 ppm. The ID HMDB codes are mentioned in column 3.

| m/z                                       | Identification           | ID (HMDB)                   |
|-------------------------------------------|--------------------------|-----------------------------|
| <b>TCA metabolites (n=7)</b>              |                          |                             |
| 117.0930                                  | Fumaric acid             | <a href="#">HMDB0000134</a> |
| 119.0877                                  | Succinic acid            | <a href="#">HMDB0000254</a> |
| 135.1185                                  | L-malic acid             | <a href="#">HMDB0000156</a> |
| 161.1203                                  | Tryptamine               | <a href="#">HMDB0000303</a> |
| 177.0599                                  | N-Hydroxyl tryptamine    | <a href="#">HMDB0255154</a> |
| 177.1664                                  | Serotonin                | <a href="#">HMDB0000259</a> |
| 193.0031                                  | Citric acid              | <a href="#">HMDB0000094</a> |
| <b>Amino acids and derivatives (n=32)</b> |                          |                             |
| 110.0656                                  | Hypotaurine              | <a href="#">HMDB0000965</a> |
| 116.1090                                  | L-Proline                | <a href="#">HMDB0000162</a> |
| 118.0886                                  | Valine                   | <a href="#">HMDB0000883</a> |
| 120.0826                                  | Threonine                | <a href="#">HMDB0000167</a> |
| 125.9926                                  | Taurine                  | <a href="#">HMDB0000251</a> |
| 130.0882                                  | Oxoproline               | <a href="#">HMDB0304793</a> |
| 131.1090                                  | Ketoleucine              | <a href="#">HMDB0000695</a> |
| 132.1046                                  | Isoleucine               | <a href="#">HMDB0000172</a> |
| 133.1114                                  | Asparagine               | <a href="#">HMDB0000168</a> |
| 138.0920                                  | Tyramine                 | <a href="#">HMDB0000306</a> |
| 144.0896                                  | Proline betaine          | <a href="#">HMDB0004827</a> |
| 147.0221                                  | Lysine                   | <a href="#">HMDB0000182</a> |
| 147.1168                                  | L-Glutamine              | <a href="#">HMDB0000641</a> |
| 148.0827                                  | Glutamic acid            | <a href="#">HMDB0000148</a> |
| 148.9852                                  | D-2-Hydroxyglutaric acid | <a href="#">HMDB0000606</a> |
| 156.0802                                  | Histidine                | <a href="#">HMDB0000177</a> |
| 158.9969                                  | N-Acetylproline          | <a href="#">HMDB0094701</a> |
| 163.6470                                  | 5-hydroxylysine          | <a href="#">HMDB0000450</a> |
| 166.0911                                  | Phenylalanine            | <a href="#">HMDB0000159</a> |
| 170.0280                                  | 1-Methylhistidine        | <a href="#">HMDB0000001</a> |
| 173.1574                                  | Glycylproline            | <a href="#">HMDB0000721</a> |
| 174.0451                                  | Arginine                 | <a href="#">HMDB0000517</a> |
| 175.1360                                  | Argininic acid           | <a href="#">HMDB0003148</a> |
| 176.0426                                  | Tyrosine                 | <a href="#">HMDB0000158</a> |
| 182.1604                                  | L-Tryptophan             | <a href="#">HMDB0000929</a> |
| 205.0995                                  | Kynurenine               | <a href="#">HMDB0000684</a> |
| 209.1729                                  | Glycyl-Histidine         | <a href="#">HMDB0028843</a> |
| 213.1822                                  | Acetyl hydroxytryptamine | <a href="#">HMDB0001238</a> |
| 219.1772                                  | 5-Hydroxy-L-tryptophan   | <a href="#">HMDB0000472</a> |
| 221.1395                                  | N-Acetyl-L-tyrosine      | <a href="#">HMDB0000866</a> |

|                                                                             |                               |                             |
|-----------------------------------------------------------------------------|-------------------------------|-----------------------------|
| 224.1901                                                                    | L-Cystine                     | <a href="#">HMDB0000192</a> |
| 241.1794                                                                    | Glutathione                   | <a href="#">HMDB0062697</a> |
| <b>Butyric derivatives, Methionine&amp; Cysteine Selenocomplexes (n=10)</b> |                               |                             |
| 104.1090                                                                    | GABA                          | <a href="#">HMDB0000112</a> |
| 105.0350                                                                    | 3-Hydroxybutyric acid         | <a href="#">HMDB0000357</a> |
| 121.1030                                                                    | (S)-3,4-Dihydroxybutyric acid | <a href="#">HMDB0000337</a> |
| 136.0338                                                                    | Homocysteine                  | <a href="#">HMDB0000742</a> |
| 150.1149                                                                    | Methionine                    | <a href="#">HMDB0000696</a> |
| 164.0330                                                                    | Acetylcysteine                | <a href="#">HMDB0001890</a> |
| 172.1007                                                                    | L-Homocysteine sulfate        | <a href="#">HMDB0002238</a> |
| 202.2204                                                                    | Cysteine-S-sulfate            | <a href="#">HMDB0000731</a> |
| 183.1683                                                                    | Methylselenocysteine          | <a href="#">HMDB0004113</a> |
| 196.9180                                                                    | Selenomethionine              | <a href="#">HMDB0003966</a> |
| <b>Purines and pirimidines (n=27)</b>                                       |                               |                             |
| 113.0656                                                                    | Uracil                        | <a href="#">HMDB0000300</a> |
| 115.1136                                                                    | Dihydrouracil                 | <a href="#">HMDB0000076</a> |
| 127.0954                                                                    | Thymine                       | <a href="#">HMDB0000262</a> |
| 128.9876                                                                    | 2-Thiouracil                  | <a href="#">HMDB0245323</a> |
| 129.1295                                                                    | Dihydrothymine                | <a href="#">HMDB0000079</a> |
| 136.1081                                                                    | Adenine                       | <a href="#">HMDB0000034</a> |
| 137.1347                                                                    | Hypoxanthine                  | <a href="#">HMDB0000157</a> |
| 143.1092                                                                    | 5-Hydroxymethyluracil         | <a href="#">HMDB0000469</a> |
| 152.1115                                                                    | Hydroxy adenine               | <a href="#">HMDB0000403</a> |
| 167.1095                                                                    | 3-Methylxanthine              | <a href="#">HMDB0001886</a> |
| 171.1521                                                                    | Propylthiouracil              | <a href="#">HMDB0014690</a> |
| 243.1637                                                                    | Thymidine                     | <a href="#">HMDB0000273</a> |
| 253.0018                                                                    | Deoxyinosine                  | <a href="#">HMDB0000071</a> |
| 253.1846                                                                    | Deoxyadenosine                | <a href="#">HMDB0000101</a> |
| 259.2055                                                                    | 3-Methyluridine               | <a href="#">HMDB0004813</a> |
| 268.2171                                                                    | Adenosine                     | <a href="#">HMDB0000050</a> |
| 269.2104                                                                    | Inosine                       | <a href="#">HMDB0000195</a> |
| 284.3360                                                                    | Guanosine                     | <a href="#">HMDB0000133</a> |
| 285.1756                                                                    | Xanthosine                    | <a href="#">HMDB0000299</a> |
| 298.2136                                                                    | 1-Methylguanosine             | <a href="#">HMDB0001563</a> |
| 312.3682                                                                    | N2,N2-Dimethylguanosine       | <a href="#">HMDB0004824</a> |
| 325.2580                                                                    | Uridine 5'-monophosphate      | <a href="#">HMDB0000288</a> |
| 348.9970                                                                    | Adenosine monophosphate       | <a href="#">HMDB0000045</a> |
| 349.2714                                                                    | Inosinic acid                 | <a href="#">HMDB0000175</a> |
| 364.9703                                                                    | Guanosine monophosphate       | <a href="#">HMDB0001397</a> |
| 399.3159                                                                    | S-Adenosylmethionine          | <a href="#">HMDB0001185</a> |
| 405.2314                                                                    | Uridine 5'-diphosphate        | <a href="#">HMDB0000295</a> |
| <b>Free Fatty Acids (n=14)</b>                                              |                               |                             |
| 229.1460                                                                    | Myristic acid C14:0           | <a href="#">HMDB0000806</a> |
| 255.0099                                                                    | Palmitoleic acid C16:1        | <a href="#">HMDB0003229</a> |

|                              |                                    |                             |
|------------------------------|------------------------------------|-----------------------------|
| 257.2524                     | Palmitic acid C16:0                | <a href="#">HMDB0000220</a> |
| 279.2371                     | Linolenic acid C18:3               | <a href="#">HMDB0003073</a> |
| 281.2529                     | Linoleic acid C18:2                | <a href="#">HMDB0000673</a> |
| 283.2651                     | Oleic acid C18:1                   | <a href="#">HMDB0000207</a> |
| 285.2686                     | Stearic acid C18:0                 | <a href="#">HMDB0000827</a> |
| 305.2669                     | Arahdonic acid C20:4               | HMDB0001043                 |
| 307.2610                     | Eicosatrienoic acid C20:3          | <a href="#">HMDB0002925</a> |
| 309.2323                     | Eicosadienoic acid C20:2           | HMDB0005060                 |
| 311.2621                     | Eicosenoic acid C20:1              | HMDB0002231                 |
| 313.2395                     | Arachidic acid C20:0               | HMDB0002212                 |
| 327.0552                     | Methyl arachidic acid C21:0        | LMFA01020018                |
| 329.2568                     | Docosahexenoic acid C22:6          | HMDB0002183                 |
| <b>AcylCarnitines (n=24)</b> |                                    |                             |
| 162.1152                     | L-carnitine                        | <a href="#">HMDB0000062</a> |
| 204.1263                     | Propenoylcarnitine                 | <a href="#">HMDB0013124</a> |
| 216.2365                     | L-Acetylcarnitine                  | <a href="#">HMDB0000201</a> |
| 218.1722                     | Propionylcarnitine                 | <a href="#">HMDB0000824</a> |
| 230.2524                     | Butenylcarnitine                   | <a href="#">HMDB0013126</a> |
| 244.2682                     | Tiglylcarnitine                    | <a href="#">HMDB0002366</a> |
| 246.1526                     | Valerylcarnitine                   | <a href="#">HMDB0013128</a> |
| 274.2799                     | Glutaconylcarnitine                | <a href="#">HMDB0013129</a> |
| 276.7343                     | Glutaryl carnitine                 | <a href="#">HMDB0013130</a> |
| 286.3161                     | Octenoylcarnitine                  | <a href="#">HMDB0013324</a> |
| 288.2957                     | 9-Decenoylcarnitine                | <a href="#">HMDB0013205</a> |
| 304.3065                     | 3-hydroxydecanoyl carnitine        | <a href="#">HMDB0061636</a> |
| 314.255                      | trans-2-Dodecenoylcarnitine        | <a href="#">HMDB0013326</a> |
| 332.3381                     | Tetradecanoylcarnitine             | <a href="#">HMDB0005066</a> |
| 342.3798                     | 9,12-Hexadecadienoylcarnitine      | <a href="#">HMDB0013334</a> |
| 372.3551                     | trans-Hexadec-2-enoyl carnitine    | <a href="#">HMDB0006317</a> |
| 396.3551                     | 9-Hexadecenoylcarnitine            | <a href="#">HMDB0013207</a> |
| 398.3699                     | L-Palmitoylcarnitine               | <a href="#">HMDB0000222</a> |
| 398.7684                     | Stearoylcarnitine                  | <a href="#">HMDB0000848</a> |
| 400.3867                     | Methyldocosanoylcarnitine (adduct) | HMDB0240952                 |
| 428.3246                     | Arachidyl carnitine                | <a href="#">HMDB0006460</a> |
| 439.3864                     | L-Octanoylcarnitine                | <a href="#">HMDB0000791</a> |
| 456.3621                     | Pimelylcarnitine                   | <a href="#">HMDB0013328</a> |
| 472.3326                     | Cervonyl carnitine                 | <a href="#">HMDB0006510</a> |
| <b>Bile acids (n=14)</b>     |                                    |                             |
| 377.2260                     | Lithocholic acid                   | <a href="#">HMDB0000717</a> |
| 391.2990                     | 12-Ketodeoxycholic acid            | <a href="#">HMDB0000328</a> |
| 393.2220                     | 7-Ketodeoxycholic acid             | <a href="#">HMDB0000391</a> |
| 393.3200                     | 3-Oxocholic acid                   | <a href="#">HMDB0000502</a> |
| 395.2470                     | Deoxycholic acid glycine conjugate | <a href="#">HMDB0000631</a> |
| 407.1900                     | Lithocholyltaurine                 | <a href="#">HMDB0000722</a> |

|                              |                              |                             |
|------------------------------|------------------------------|-----------------------------|
| 407.3180                     | Taurodeoxycholic acid        | <a href="#">HMDB0000896</a> |
| 409.2400                     | 7-Methyl-cholic acid         | <a href="#">HMDB0244296</a> |
| 423.3310                     | Ursocholic acid              | <a href="#">HMDB0000917</a> |
| 450.3120                     | Norcholic acid               | <a href="#">HMDB0255727</a> |
| 484.3930                     | Chenodeoxycholic acid        | <a href="#">HMDB0000518</a> |
| 500.3890                     | Deoxycholic acid             | <a href="#">HMDB0000626</a> |
| 516.3620                     | Taurocholic acid             | <a href="#">HMDB0000036</a> |
| 553.4010                     | Lithocholic acid glucuronide | <a href="#">HMDB0002513</a> |
| <b>Corticosteroids (n=8)</b> |                              |                             |
| 347.1934                     | Deoxycortisol                | <a href="#">HMDB0004030</a> |
| 361.2327                     | Cortisone                    | <a href="#">HMDB0002802</a> |
| 363.2255                     | Cortisol                     | <a href="#">HMDB0000063</a> |
| 365.1439                     | Tetrahydrocortisone          | <a href="#">HMDB0000903</a> |
| 365.2855                     | Dihydrocortisol              | <a href="#">HMDB0003259</a> |
| 367.2770                     | Tetrahydrocortisol           | <a href="#">HMDB0000949</a> |
| 377.0743                     | Oxocortisol                  | <a href="#">HMDB0000332</a> |
| 379.0897                     | Hydroxycortisol              | <a href="#">HMDB0000418</a> |
| <b>Prostaglandins (n=8)</b>  |                              |                             |
| 335.1374                     | PGA2/B2                      | <a href="#">HMDB0002752</a> |
| 337.2411                     | PGA1                         | <a href="#">HMDB0002656</a> |
| 343.3139                     | Dinor-6-keto-PGF1a           | <a href="#">HMDB0062618</a> |
| 351.2565                     | PGE3/D3                      | <a href="#">HMDB0002664</a> |
| 353.2739                     | PGE2 /D2                     | <a href="#">HMDB0060041</a> |
| 355.2895                     | PGF2a                        | <a href="#">HMDB0001139</a> |
| 357.2869                     | PGF1a                        | <a href="#">HMDB0002685</a> |
| 381.3058                     | Dimethyl-PGE2                | <a href="#">HMDB0244730</a> |
| <b>Phospholipids (n=22)</b>  |                              |                             |
| 258.2841                     | Glycerophosphocholine        | <a href="#">HMDB0000086</a> |
| 435.2664                     | LysoPA(18:2)                 | <a href="#">HMDB0007856</a> |
| 439.2300                     | LysoPA(18:0)                 | <a href="#">HMDB0007854</a> |
| 493.3107                     | LysoPA(22:1)                 | <a href="#">HMDB0114750</a> |
| 494.3330                     | LysoPC(16:1)                 | <a href="#">HMDB0010383</a> |
| 496.3725                     | LysoPC(16:0)                 | <a href="#">HMDB0010382</a> |
| 502.3828                     | LysoPE(20:4)                 | <a href="#">HMDB0011487</a> |
| 518.3312                     | LysoPC(18:3)                 | <a href="#">HMDB0010387</a> |
| 520.3492                     | LysoPC(18:2)                 | <a href="#">HMDB0010386</a> |
| 522.3648                     | LysoPC(18:1)                 | <a href="#">HMDB0002815</a> |
| 523.3199                     | LysoPA(24:0)                 | <a href="#">HMDB0114756</a> |
| 524.3817                     | LysoPC(18:0)                 | <a href="#">HMDB0010384</a> |
| 526.3022                     | LysoPE(22:6)                 | <a href="#">HMDB0011496</a> |
| 528.4205                     | LysoPE(22:5)                 | <a href="#">HMDB0011494</a> |
| 534.3287                     | LysoPE(22:2)                 | <a href="#">HMDB0011492</a> |
| 542.3328                     | LysoPC(20:5)                 | <a href="#">HMDB0010397</a> |
| 544.3817                     | LysoPC(20:4)                 | <a href="#">HMDB0010395</a> |

|          |               |                             |
|----------|---------------|-----------------------------|
| 546.3870 | LysoPC(20:3)  | <a href="#">HMDB0010393</a> |
| 568.3494 | LysoPC(22:6)  | <a href="#">HMDB0010404</a> |
| 570.4166 | LysoPC(22:5)  | <a href="#">HMDB0010402</a> |
| 572.4492 | LysoPC(22:4)  | <a href="#">HMDB0010401</a> |
| 732.5668 | PC(16:0/16:1) | <a href="#">HMDB0007969</a> |
