# Supplementary material for: Metabolic Profiles and Blood Biomarkers to Discriminate between Benign Thyroid Nodules and Papillary Carcinoma, Based on UHPLC-QTOF-ESI+-MS Analysis
Source: MDPI journal article supplement (doi:10.3390/ijms25063495), 2024-03-20
Supplement: s1 [file s1]

## METABOLOMICS METHODOLOGY

Aim: metabolic profile of blood, urine by **untargeted** Metabolomics using successive steps

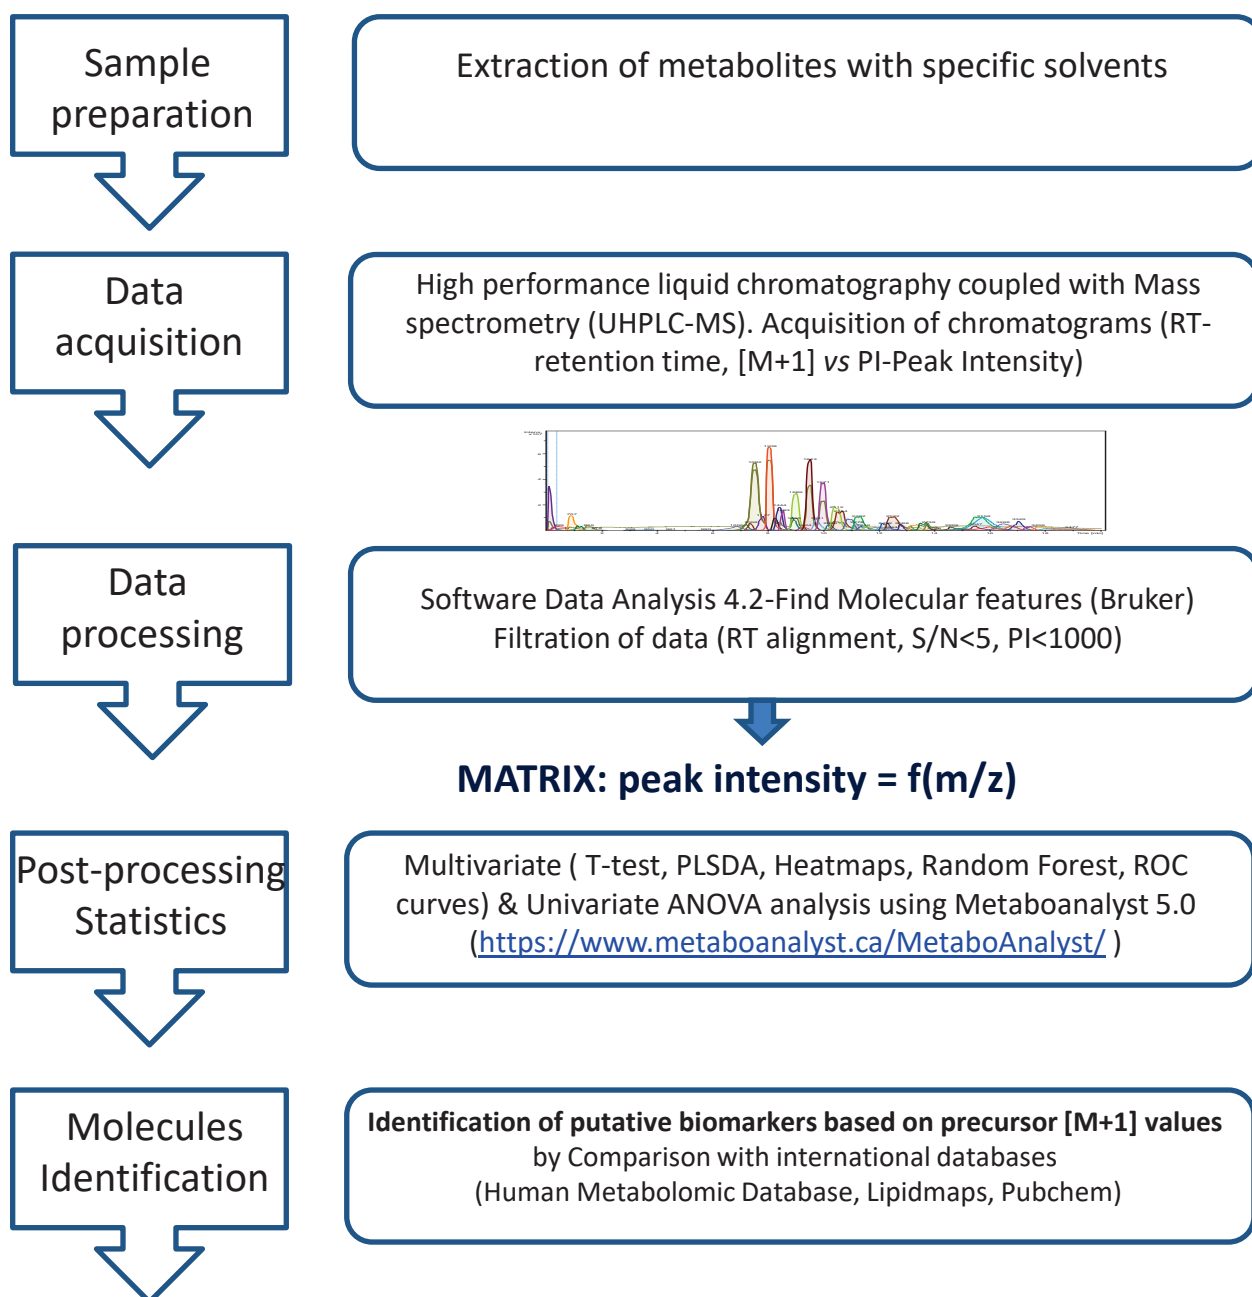

Fig. S1. Metabolomics methodology. The steps from sample preparation to molecule identification.
