# Supplementary figures and images for: Metabolic Profiles and Blood Biomarkers to Discriminate between Benign Thyroid Nodules and Papillary Carcinoma, Based on UHPLC-QTOF-ESI+-MS Analysis
Source: MDPI journal article supplement (doi:10.3390/ijms25063495), 2024-03-20

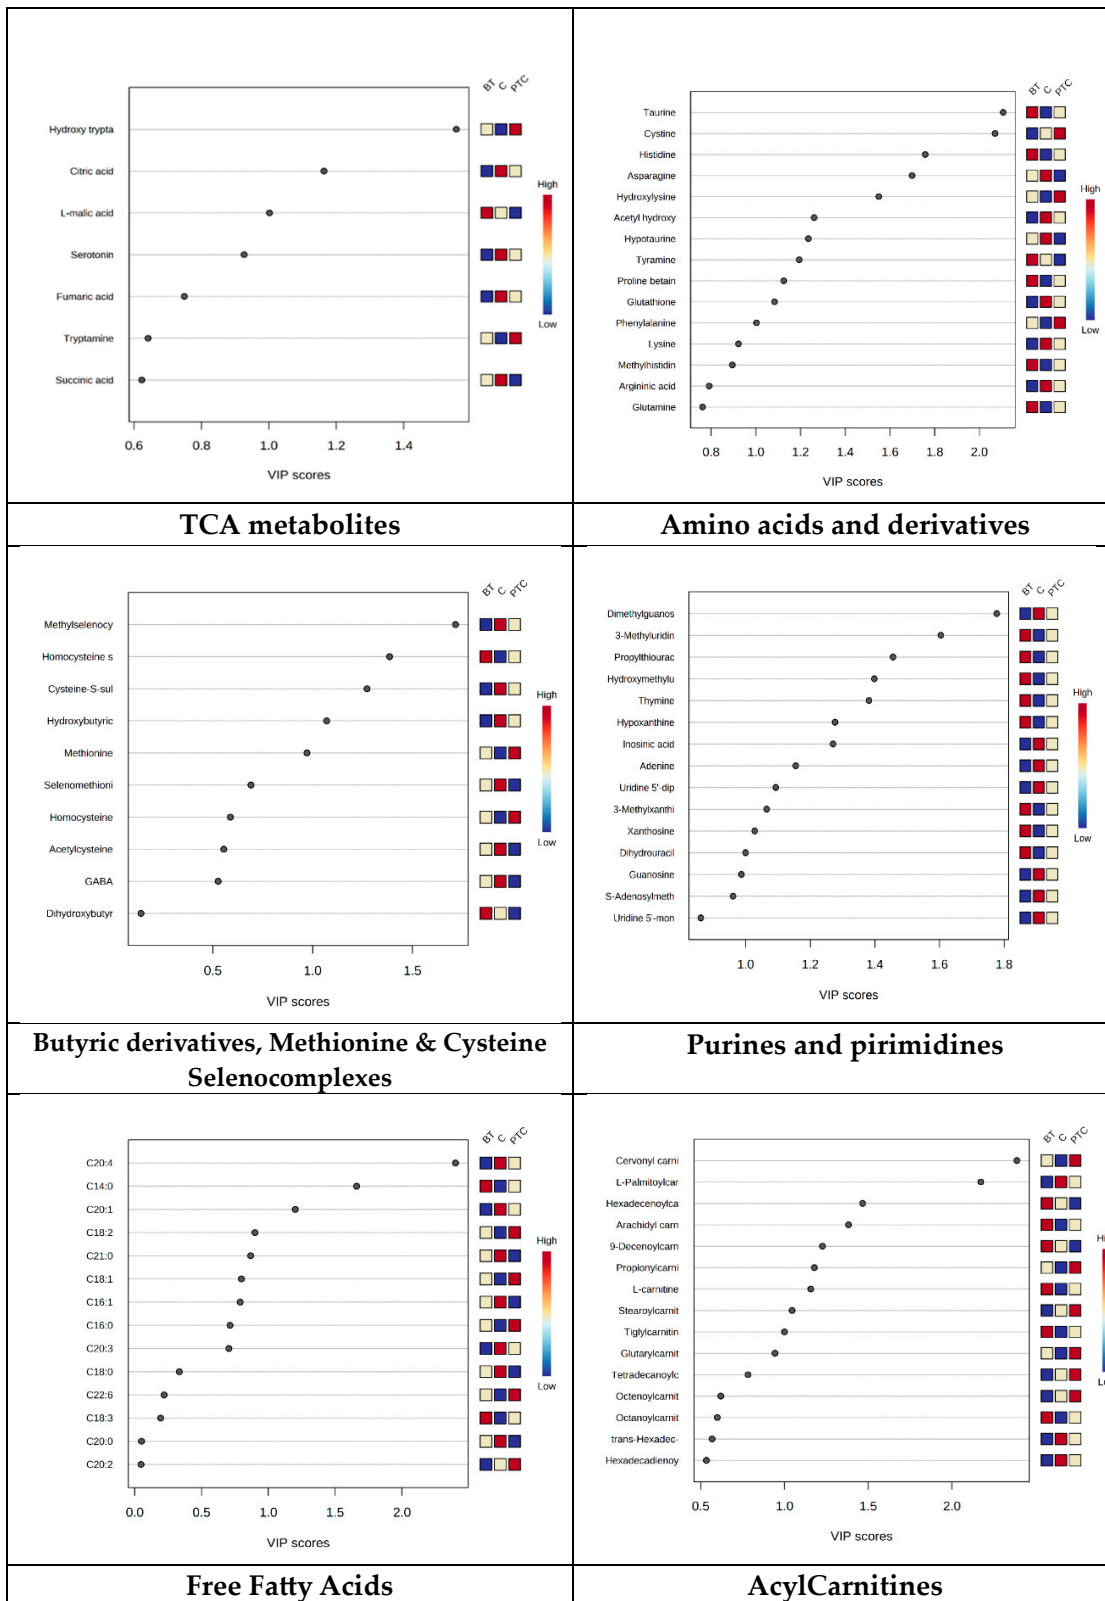

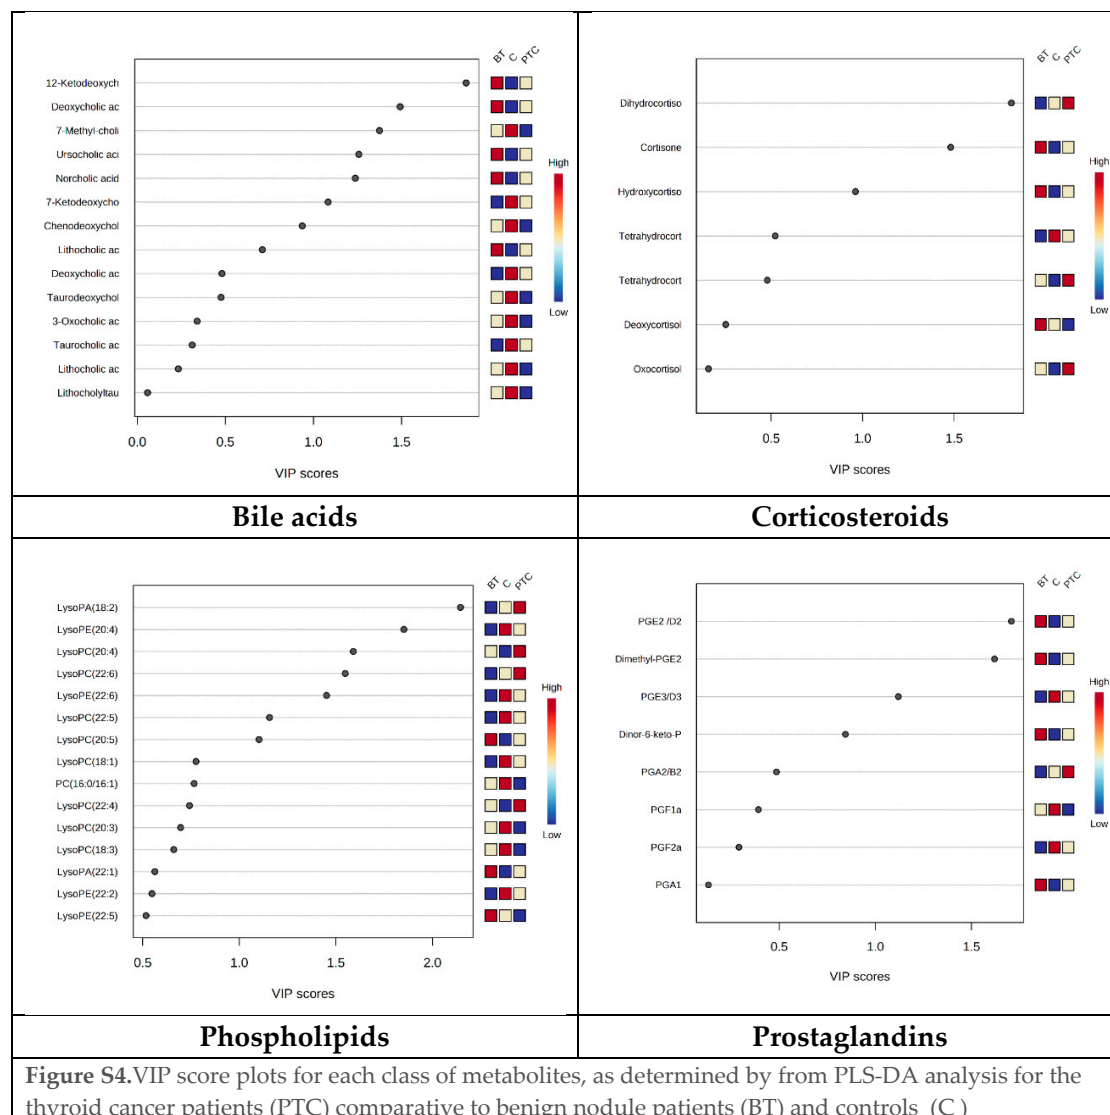

Supplement: s1 [file s1]

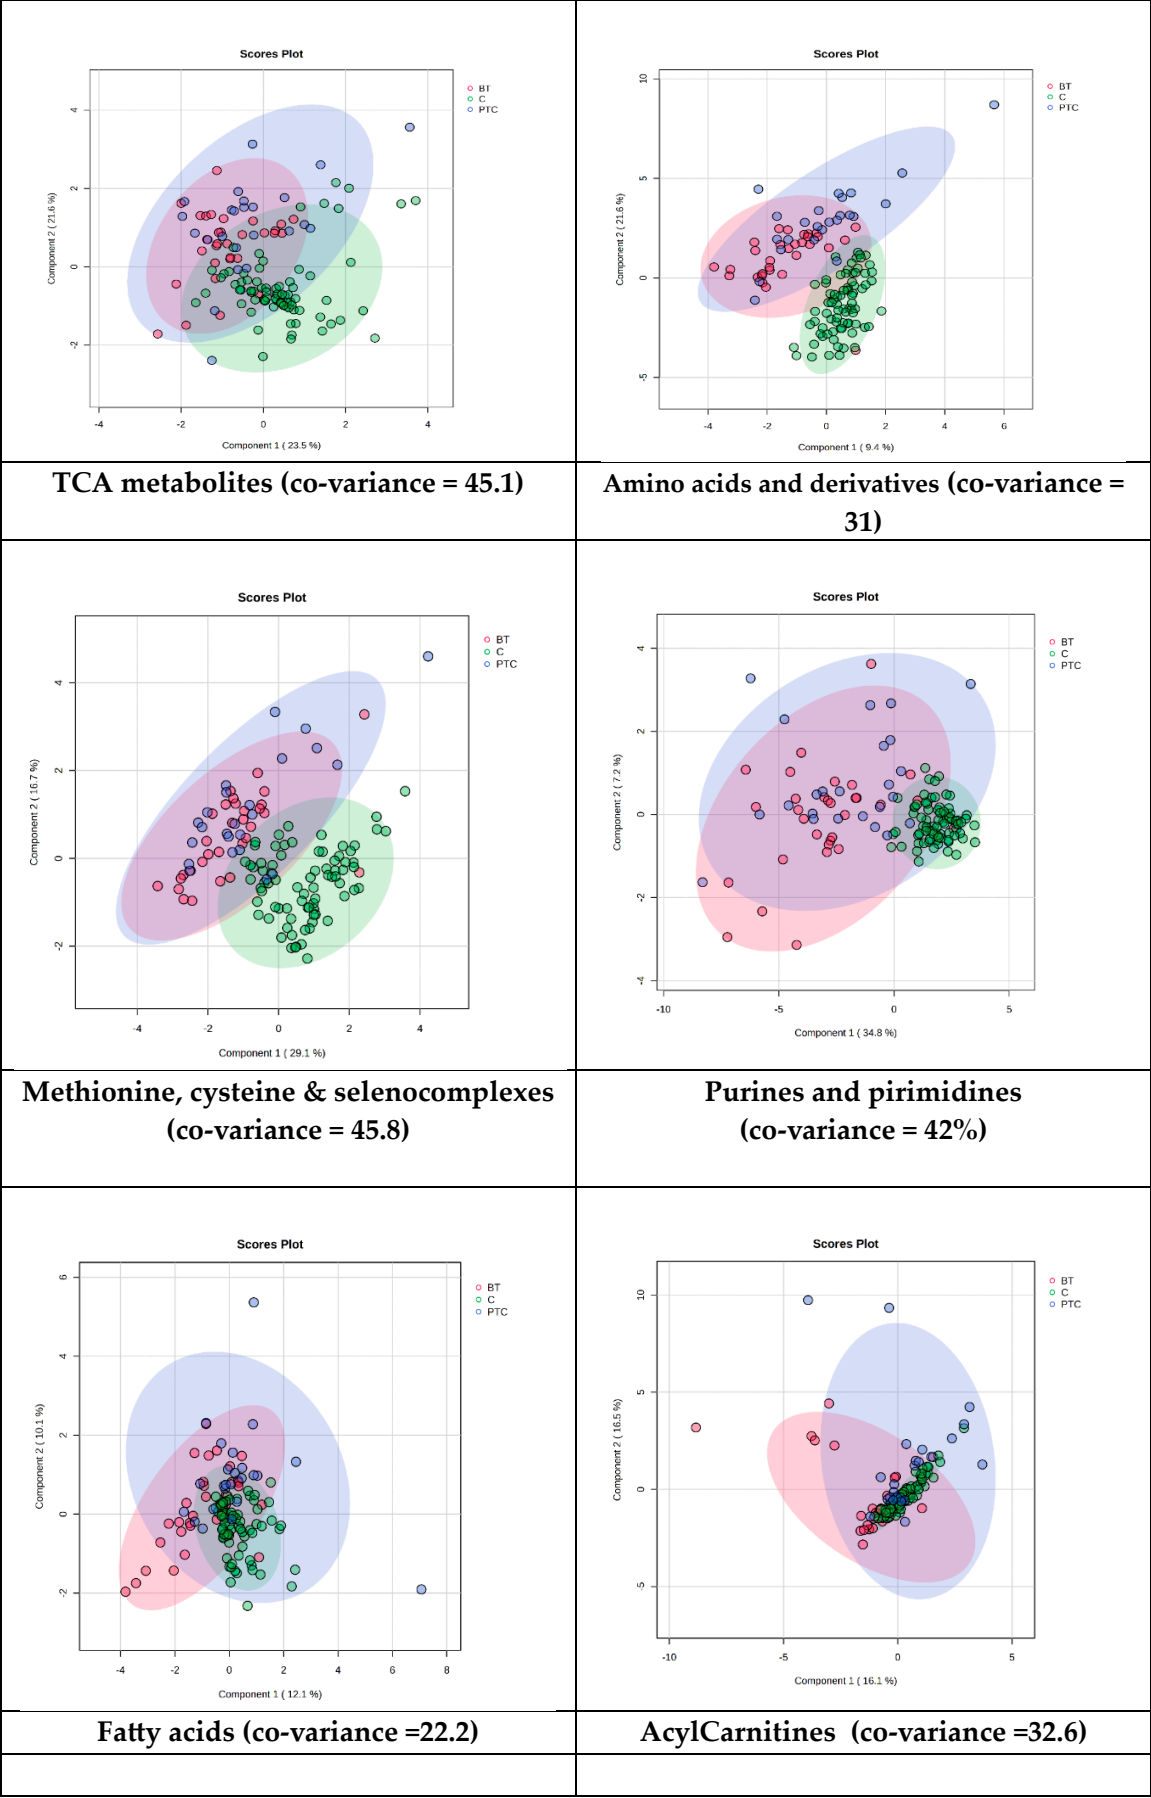

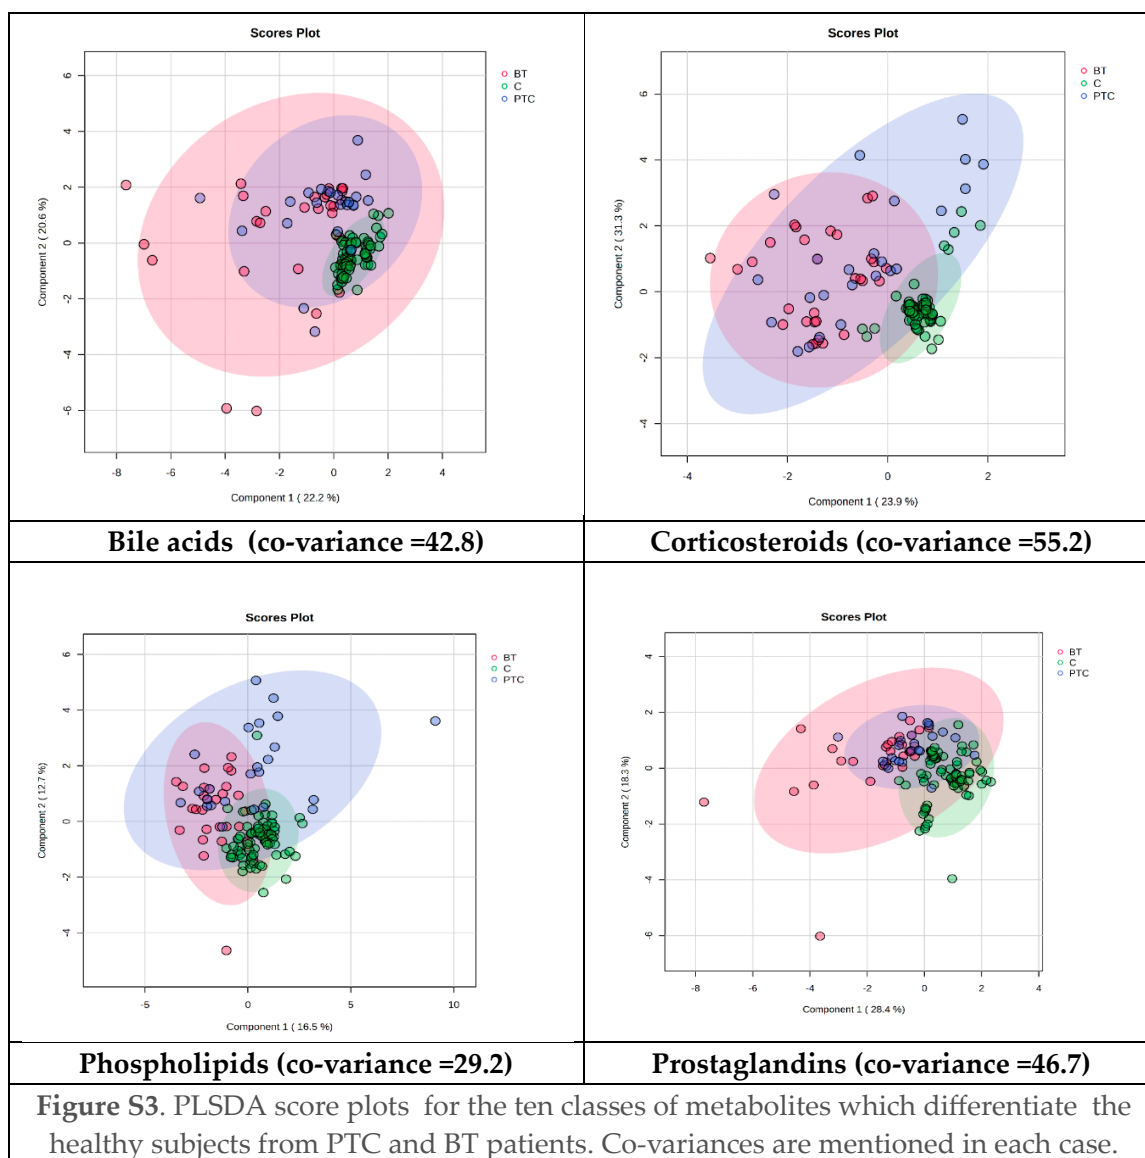

Supplement: s1 [file s1]
